# Supplementary material for: Autopsy of Adult Patients Deceased in an Academic Hospital: Considerations of Doctors and Next-of-Kin in the Consent Process
Source: PubMed Central journal article supplement (PMC5063372; doi:10.1371/journal.pone.0163811), 2016-10-13
Supplement: pone.0163811.s001.pdf [file pone.0163811.s001.pdf]

## MIA- QUESTIONNAIRE

Form filled in by: \_\_\_\_\_

Hospital ward: \_\_\_\_\_ Doctor's position: \_\_\_\_\_

Date: \_\_\_\_\_

### 1 Patient specifics

Sex:  male  female

Age: \_\_\_\_\_

Ethnicity: \_\_\_\_\_

Religion: \_\_\_\_\_

Donation: yes / no \*

Way of dying: sudden / long illness \*

Patient ID  
(sticker)

\* Line through if **not** applicable

2

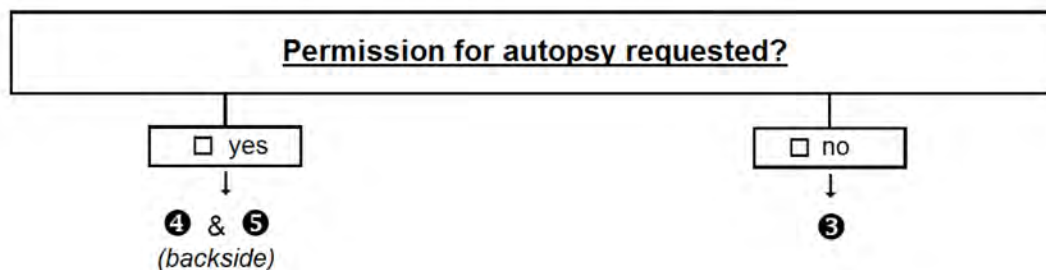

3

### Reason for not requesting permission for autopsy

*please tick as applicable*

- Cause of death known, no questions for post-mortem
- Long illness, autopsy too much to request
- Expecting not to get permission from next of kin
- Consent for donation (organs/ tissue/ science)
- Uncomfortable situation, autopsy request inappropriate
- Not being the right person/ doctor to ask permission
- No family/ relatives known or available
- Too busy to ask permission for autopsy
- Doctor's own considerations (religious/ philosophical)
- Inadequate knowledge to properly inform next of kin
- Other: \_\_\_\_\_

\_\_\_\_\_  
\_\_\_\_\_  
\_\_\_\_\_

↓  
end of  
form

#### 4 Relatives specifics

Relation to deceased:  partner  family  non-family

Ethnicity: \_\_\_\_\_

Religion: \_\_\_\_\_

#### 5

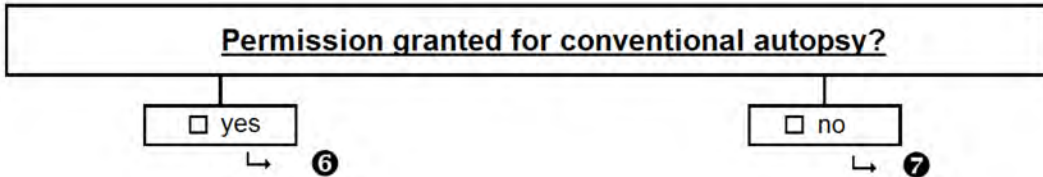

#### 6 Motivation to permit autopsy

*please tick as applicable*

- To find out about the cause of death
- To find out if the deceased had any other disease
- On doctors request/ advice
- To evaluate status of known disease (severity/ stage)
- To contribute to medical research/ doctors knowledge
- For counseling purposes/ to know heredity of diseases
- For juridical motives
- Other: \_\_\_\_\_

#### 7 Motivation to deny autopsy

*please tick as applicable*

- Cause of death is already known
- Long illness, deceased has suffered enough
- Fear for mutilation of the deceased's body
- Religious and/ or philosophical motives
- Autopsy takes too long
- Finding autopsy scare/ macabre
- Consent for donation (tissue/ organ/ science)
- Doctors decision/ practical or logistic limitation
- Other: \_\_\_\_\_
